# Supplementary material for: RS-5645 attenuates inflammatory cytokine storm induced by SARS-CoV-2 spike protein and LPS by modulating pulmonary microbiota
Source: PubMed Central journal article supplement (PMC8416739; doi:10.7150/ijbs.63329), 2021-07-25
Supplement: ijbsv17p3305s1.pdf [file ijbsv17p3305s1.pdf]

**Table S1 Statistical table of per level species of samples**

| <b>Sample</b> | <b>Kindom</b> | <b>Phylum</b> | <b>Class</b> | <b>Order</b> | <b>Family</b> | <b>Genus</b> | <b>Species</b> |
|---------------|---------------|---------------|--------------|--------------|---------------|--------------|----------------|
| M1            | 1             | 17            | 46           | 122          | 203           | 364          | 390            |
| M2            | 1             | 17            | 47           | 116          | 195           | 341          | 363            |
| M3            | 1             | 16            | 42           | 104          | 182           | 319          | 339            |
| M4            | 1             | 19            | 45           | 113          | 198           | 337          | 358            |
| M5            | 1             | 17            | 40           | 107          | 189           | 322          | 344            |
| M6            | 1             | 16            | 39           | 107          | 191           | 341          | 362            |
| M7            | 1             | 17            | 41           | 115          | 195           | 326          | 348            |
| M8            | 1             | 17            | 42           | 110          | 198           | 336          | 359            |
| R1            | 1             | 18            | 35           | 63           | 103           | 188          | 196            |
| R2            | 1             | 16            | 30           | 61           | 94            | 168          | 174            |
| R3            | 1             | 16            | 34           | 70           | 109           | 184          | 191            |
| R4            | 1             | 16            | 31           | 59           | 94            | 161          | 169            |
| R5            | 1             | 16            | 31           | 60           | 93            | 172          | 177            |
| R6            | 1             | 16            | 31           | 62           | 100           | 185          | 192            |
| R7            | 1             | 16            | 31           | 58           | 92            | 162          | 168            |
| R8            | 1             | 18            | 36           | 69           | 101           | 169          | 174            |
| Total         | 1             | 24            | 63           | 165          | 286           | 563          | 610            |

**Table S2 Alpha diversity index statistics**

| <b>Sample ID</b> | <b>OTU</b> | <b>ACE</b> | <b>Chao1</b> | <b>Simpson</b> | <b>Shannon</b> | <b>Coverage</b> |
|------------------|------------|------------|--------------|----------------|----------------|-----------------|
| M1               | 643        | 670.847    | 675.2174     | 0.0444         | 4.8055         | 0.9992          |
| M2               | 572        | 594.0522   | 622.6        | 0.022          | 5.2633         | 0.9996          |
| M3               | 525        | 552.6044   | 558.0556     | 0.0428         | 4.3476         | 0.9993          |
| M4               | 572        | 598.822    | 599.3529     | 0.0372         | 4.9085         | 0.9994          |
| M5               | 540        | 574.9222   | 582.8448     | 0.0703         | 3.7531         | 0.9984          |
| M6               | 562        | 579.2826   | 597.4545     | 0.0471         | 4.2469         | 0.9991          |
| M7               | 539        | 564.3252   | 624          | 0.032          | 4.7163         | 0.9993          |
| M8               | 582        | 598.3468   | 606.4737     | 0.0421         | 4.6507         | 0.9993          |
| R1               | 292        | 361.2355   | 352.1538     | 0.0799         | 3.2486         | 0.9988          |
| R2               | 267        | 329.0938   | 339          | 0.0735         | 3.2969         | 0.9989          |
| R3               | 312        | 358.785    | 365.8235     | 0.0823         | 3.2541         | 0.999           |
| R4               | 262        | 335.9728   | 333.5        | 0.0843         | 3.2057         | 0.9989          |
| R5               | 273        | 324.8863   | 334          | 0.097          | 3.1313         | 0.999           |
| R6               | 290        | 342.5008   | 364.2857     | 0.0819         | 3.2831         | 0.9989          |
| R7               | 256        | 296.5531   | 290.1818     | 0.0835         | 3.246          | 0.9992          |
| R8               | 279        | 347.5039   | 348.0303     | 0.0917         | 3.1508         | 0.9989          |

**Table S3 KEGG function prediction**

| <b>Class1</b> | <b>Class2</b>                                  | <b>R: mean<br/>rel.freq.(%)<br/>)</b> | <b>R:<br/>std.dev.(%)<br/>)</b> | <b>M: mean<br/>rel.freq.(%)<br/>)</b> | <b>M:<br/>std.dev.(%)<br/>)</b> | <b>p-values</b> | <b>Differenc<br/>e between<br/>means</b> |
|---------------|------------------------------------------------|---------------------------------------|---------------------------------|---------------------------------------|---------------------------------|-----------------|------------------------------------------|
| Metabolism    | Carbohydrate metabolism                        | 8.883439                              | 0.04585                         | 9.354409                              | 0.232478                        | 0.00133         | -0.47097                                 |
| Metabolism    | Lipid metabolism                               | 1.972809                              | 0.005608                        | 2.484798                              | 0.071476                        | 1.06E-06        | -0.51199                                 |
| Metabolism    | Metabolism of cofactors and<br>vitamins        | 4.638211                              | 0.017373                        | 3.984027                              | 0.098868                        | 1.11E-06        | 0.654183                                 |
| Metabolism    | Energy metabolism                              | 4.383104                              | 0.033685                        | 4.144153                              | 0.108688                        | 0.000713        | 0.238951                                 |
| Metabolism    | Amino acid metabolism                          | 6.434252                              | 0.036154                        | 8.000386                              | 0.566679                        | 0.000289        | -1.56613                                 |
| Metabolism    | Nucleotide metabolism                          | 3.924103                              | 0.016772                        | 2.866114                              | 0.092703                        | 3.35E-08        | 1.057989                                 |
| Metabolism    | Biosynthesis of other secondary<br>metabolites | 0.882654                              | 0.004903                        | 0.88302                               | 0.027139                        | 0.972938        | -0.00037                                 |

|                                |                                           |          |          |          |          |          |          |
|--------------------------------|-------------------------------------------|----------|----------|----------|----------|----------|----------|
| Metabolism                     | Metabolism of terpenoids and polyketides  | 1.168176 | 0.005523 | 1.523482 | 0.139499 | 0.000469 | -0.35531 |
| Metabolism                     | Xenobiotics biodegradation and metabolism | 0.954724 | 0.008444 | 2.20728  | 0.221507 | 4.60E-06 | -1.25256 |
| Metabolism                     | Metabolism of other amino acids           | 1.387329 | 0.002569 | 1.64227  | 0.049011 | 7.44E-06 | -0.25494 |
| Metabolism                     | Glycan biosynthesis and metabolism        | 1.534626 | 0.013536 | 0.97673  | 0.080903 | 1.04E-06 | 0.557896 |
| Genetic Information Processing | Translation                               | 3.894125 | 0.014996 | 2.615477 | 0.084175 | 5.79E-09 | 1.278648 |
| Metabolism                     | Global and overview maps                  | 43.32704 | 0.082044 | 42.22295 | 0.387132 | 0.000207 | 1.104093 |
| Human Diseases                 | Drug resistance: Antimicrobial            | 0.924019 | 0.007067 | 0.783479 | 0.09786  | 0.009031 | 0.140539 |
| Human Diseases                 | Drug resistance: Antineoplastic           | 0.023378 | 0.00125  | 0.071073 | 0.007861 | 2.10E-06 | -0.04769 |

|                                         |                                     |          |          |          |          |          |          |
|-----------------------------------------|-------------------------------------|----------|----------|----------|----------|----------|----------|
| Environmental<br>Information Processing | Membrane transport                  | 3.709301 | 0.040312 | 3.900721 | 0.446984 | 0.316375 | -0.19142 |
| Environmental<br>Information Processing | Signal transduction                 | 1.792662 | 0.010323 | 2.4788   | 0.272473 | 0.000485 | -0.68614 |
| Cellular Processes                      | Cellular community -<br>prokaryotes | 1.392987 | 0.011539 | 1.684539 | 0.036605 | 1.27E-07 | -0.29155 |
| Cellular Processes                      | Cell motility                       | 0.127005 | 0.008411 | 0.690011 | 0.135837 | 2.84E-05 | -0.56301 |
| Genetic Information<br>Processing       | Folding, sorting and<br>degradation | 1.475633 | 0.007072 | 1.235968 | 0.049861 | 9.55E-06 | 0.239665 |
| Genetic Information<br>Processing       | Transcription                       | 0.175784 | 0.000876 | 0.124811 | 0.002346 | 2.48E-11 | 0.050973 |
| Genetic Information<br>Processing       | Replication and repair              | 3.15978  | 0.012569 | 2.186393 | 0.070303 | 9.54E-09 | 0.973387 |

|                                         |                                        |          |          |          |          |          |          |
|-----------------------------------------|----------------------------------------|----------|----------|----------|----------|----------|----------|
| Organismal Systems                      | Endocrine system                       | 0.580516 | 0.00709  | 0.596796 | 0.01362  | 0.021525 | -0.01628 |
| Environmental<br>Information Processing | Signaling molecules and<br>interaction | 0.044647 | 0.000258 | 0.028907 | 0.000695 | 2.75E-11 | 0.01574  |
| Cellular Processes                      | Cell growth and death                  | 0.529119 | 0.004051 | 0.497539 | 0.022647 | 0.009902 | 0.03158  |
| Cellular Processes                      | Transport and catabolism               | 0.238787 | 0.001467 | 0.264106 | 0.010833 | 0.000658 | -0.02532 |
| Organismal Systems                      | Aging                                  | 0.369564 | 0.002708 | 0.370638 | 0.020652 | 0.91509  | -0.00107 |
| Organismal Systems                      | Circulatory system                     | 0.042303 | 0.002542 | 0.027259 | 0.006609 | 0.000528 | 0.015044 |
| Organismal Systems                      | Development                            | 0        | 0        | 2.34E-06 | 2.76E-06 | 0.067347 | #####    |
| Cellular Processes                      | Cellular community -<br>eukaryotes     | 1.23E-05 | 7.06E-06 | 0.000139 | 9.17E-05 | 0.010408 | -0.00013 |
| Organismal Systems                      | Immune system                          | 0.04596  | 0.002018 | 0.03424  | 0.004225 | 0.000127 | 0.011719 |
| Organismal Systems                      | Environmental adaptation               | 0.109374 | 0.000585 | 0.115877 | 0.00775  | 0.067919 | -0.0065  |
| Organismal Systems                      | Nervous system                         | 0.121119 | 0.002131 | 0.185374 | 0.037315 | 0.003621 | -0.06425 |

|                    |                                  |          |          |          |          |          |          |
|--------------------|----------------------------------|----------|----------|----------|----------|----------|----------|
| Organismal Systems | Sensory system                   | 4.77E-06 | 2.94E-06 | 5.10E-05 | 3.47E-05 | 0.012028 | #####    |
| Human Diseases     | Endocrine and metabolic diseases | 0.215427 | 0.000996 | 0.177432 | 0.008002 | 1.04E-05 | 0.037994 |
| Organismal Systems | Excretory system                 | 0.013669 | 0.001053 | 0.026778 | 0.001432 | 7.14E-10 | -0.01311 |
| Organismal Systems | Digestive system                 | 0.073867 | 0.001721 | 0.041369 | 0.008842 | 4.15E-05 | 0.032498 |
| Human Diseases     | Neurodegenerative diseases       | 0.281568 | 0.007427 | 0.29518  | 0.040799 | 0.430947 | -0.01361 |
| Human Diseases     | Substance dependence             | 0.002846 | 0.000361 | 0.034114 | 0.010502 | 0.000199 | -0.03127 |
| Human Diseases     | Infectious diseases: Bacterial   | 0.414652 | 0.002392 | 0.375867 | 0.035518 | 0.027521 | 0.038785 |
| Human Diseases     | Infectious diseases: Parasitic   | 0.041491 | 0.001687 | 0.075876 | 0.004792 | 1.83E-07 | -0.03438 |
| Human Diseases     | Infectious diseases: Viral       | 0.003645 | 0.000464 | 0.045874 | 0.019346 | 0.001008 | -0.04223 |
| Human Diseases     | Cancers: Overview                | 0.568158 | 0.002927 | 0.561623 | 0.006872 | 0.051201 | 0.006536 |
| Human Diseases     | Cancers: Specific types          | 0.062814 | 0.001721 | 0.130327 | 0.017221 | 3.67E-05 | -0.06751 |
| Human Diseases     | Immune diseases                  | 0.074552 | 0.001538 | 0.036889 | 0.001206 | 0        | 0.037663 |

|                |                         |          |          |          |          |        |          |
|----------------|-------------------------|----------|----------|----------|----------|--------|----------|
| Human Diseases | Cardiovascular diseases | 0.000762 | 0.000134 | 0.016853 | 0.005799 | 0.0003 | -0.01609 |
|----------------|-------------------------|----------|----------|----------|----------|--------|----------|

**Table S4 COG function prediction**

| <b>Class1</b>                         | <b>Class2</b>                                                    | <b>R: mean<br/>rel.freq.(%)</b> | <b>R:<br/>std.dev.(%)</b> | <b>M: mean<br/>rel.freq.(%)</b> | <b>M:<br/>std.dev.(%)</b> | <b>p-values</b> | <b>Difference<br/>between<br/>means</b> |
|---------------------------------------|------------------------------------------------------------------|---------------------------------|---------------------------|---------------------------------|---------------------------|-----------------|-----------------------------------------|
| INFORMATION STORAGE<br>AND PROCESSING | RNA processing and<br>modification                               | 0.026886                        | 0.001262                  | 0.040951                        | 0.013555                  | 0.032625        | -0.01406                                |
| INFORMATION STORAGE<br>AND PROCESSING | Chromatin structure and<br>dynamics                              | 0.033982                        | 0.00098                   | 0.039706                        | 0.007425                  | 0.084889        | -0.00572                                |
| METABOLISM                            | Energy production and<br>conversion                              | 5.579638                        | 0.037921                  | 6.073492                        | 0.216543                  | 0.000763        | -0.49385                                |
| CELLULAR PROCESSES<br>AND SIGNALING   | Cell cycle control, cell<br>division, chromosome<br>partitioning | 1.459879                        | 0.008335                  | 1.009213                        | 0.016381                  | 1.67E-13        | 0.450666                                |

|                                    |                                                 |          |          |          |          |          |          |
|------------------------------------|-------------------------------------------------|----------|----------|----------|----------|----------|----------|
| METABOLISM                         | Amino acid transport and metabolism             | 7.834755 | 0.036495 | 9.030411 | 0.577256 | 0.001425 | -1.19566 |
| METABOLISM                         | Nucleotide transport and metabolism             | 3.475337 | 0.021065 | 2.52883  | 0.071375 | 2.17E-09 | 0.946507 |
| METABOLISM                         | Carbohydrate transport and metabolism           | 5.835497 | 0.078328 | 6.762894 | 0.476146 | 0.001784 | -0.9274  |
| METABOLISM                         | Coenzyme transport and metabolism               | 4.977711 | 0.024751 | 4.416378 | 0.143993 | 2.94E-05 | 0.561333 |
| METABOLISM                         | Lipid transport and metabolism                  | 2.829175 | 0.015841 | 3.995049 | 0.637956 | 0.002618 | -1.16587 |
| INFORMATION STORAGE AND PROCESSING | Translation, ribosomal structure and biogenesis | 8.728571 | 0.037099 | 5.658637 | 0.094822 | 2.46E-13 | 3.069934 |
| INFORMATION STORAGE                | Transcription                                   | 5.547268 | 0.062517 | 7.699707 | 0.194173 | 5.46E-09 | -2.15244 |

|                                       |                                                                    |          |          |          |          |          |          |
|---------------------------------------|--------------------------------------------------------------------|----------|----------|----------|----------|----------|----------|
| AND PROCESSING                        |                                                                    |          |          |          |          |          |          |
| INFORMATION STORAGE<br>AND PROCESSING | Replication,<br>recombination and repair                           | 7.509548 | 0.034654 | 5.299041 | 0.310043 | 7.29E-07 | 2.210507 |
| CELLULAR PROCESSES<br>AND SIGNALING   | Cell<br>wall/membrane/envelope<br>biogenesis                       | 7.347763 | 0.035642 | 5.850639 | 0.113816 | 2.23E-09 | 1.497124 |
| CELLULAR PROCESSES<br>AND SIGNALING   | Cell motility                                                      | 0.851858 | 0.018862 | 1.367555 | 0.28939  | 0.002825 | -0.5157  |
| CELLULAR PROCESSES<br>AND SIGNALING   | Posttranslational<br>modification, protein<br>turnover, chaperones | 4.04353  | 0.018692 | 3.565939 | 0.083344 | 1.73E-06 | 0.477592 |
| METABOLISM                            | Inorganic ion transport<br>and metabolism                          | 5.528844 | 0.020279 | 5.049294 | 0.194984 | 0.00056  | 0.47955  |

|                                  |                                                               |          |          |          |          |          |          |
|----------------------------------|---------------------------------------------------------------|----------|----------|----------|----------|----------|----------|
| METABOLISM                       | Secondary metabolites biosynthesis, transport and catabolism  | 1.188608 | 0.012821 | 2.640668 | 0.546117 | 0.000393 | -1.45206 |
| POORLY CHARACTERIZED             | General function prediction only                              | 11.15609 | 0.033805 | 12.01119 | 0.267418 | 0.000117 | -0.8551  |
| POORLY CHARACTERIZED             | Function unknown                                              | 8.343026 | 0.032279 | 7.846619 | 0.289341 | 0.00309  | 0.496407 |
| CELLULAR PROCESSES AND SIGNALING | Signal transduction mechanisms                                | 3.107754 | 0.054443 | 5.251799 | 0.504357 | 2.15E-05 | -2.14404 |
| CELLULAR PROCESSES AND SIGNALING | Intracellular trafficking, secretion, and vesicular transport | 2.521034 | 0.03548  | 2.037055 | 0.276141 | 0.002857 | 0.48398  |
| CELLULAR PROCESSES               | Defense mechanisms                                            | 2.045319 | 0.031111 | 1.811781 | 0.233852 | 0.036319 | 0.233538 |

|                                     |                          |          |          |          |          |          |          |
|-------------------------------------|--------------------------|----------|----------|----------|----------|----------|----------|
| AND SIGNALING                       |                          |          |          |          |          |          |          |
| CELLULAR PROCESSES<br>AND SIGNALING | Extracellular structures | 0.025516 | 0.001135 | 0.001373 | 0.001394 | 1.36E-13 | 0.024142 |
| CELLULAR PROCESSES<br>AND SIGNALING | Nuclear structure        | 0        | 0        | 0        | 0        | 1        | 0        |
| CELLULAR PROCESSES<br>AND SIGNALING | Cytoskeleton             | 0.002413 | 0.000233 | 0.011779 | 0.000903 | 1.76E-08 | -0.00937 |
